# Supplementary material for: Understanding the Diurnal Oscillation of the Gut Microbiota Using Microbial Culture
Source: MDPI journal article supplement (doi:10.3390/life13030831), 2023-03-19
Supplement: s1 [file s1]

**Table S1.** Median (minimum-maximum) CFU/ml values, considering culture media, sample type, and collection time. Different capital letters in the same column represent statistically significant differences in alphabetic order among the collection sites for the same ZT ( $p < 0.05$ ; Kruskal-Wallis, Dunn). Different symbols in the same column represent statistically significant differences for different ZT specimens from the same site in the same culture media ( $p < 0.05$ ; Kruskal-Wallis, Dunn). BHI = Brain Heart Infusion Agar; SA = Sabouraud Agar; MS = Mitis Salivarius Agar; BA = Brucella Agar; FC = Feces; CE = Cecum; RT = Rectum; ZT = Zeitgeber time.

|      | <b>Feces Sample (FC)</b>                     |                                             |                                             |                                             |
|------|----------------------------------------------|---------------------------------------------|---------------------------------------------|---------------------------------------------|
|      | <b>BHI (CFU <math>\times 10^7</math>)</b>    | <b>SA (CFU <math>\times 10^{+2}</math>)</b> | <b>MS (CFU <math>\times 10^{+6}</math>)</b> | <b>BA (CFU <math>\times 10^{+7}</math>)</b> |
| ZT0  | 5.20 (0.15 – 17.20)                          | 4.00 (0.80 - 8.00) <b>A</b>                 | 156.00 (80.00 - 172.00) <b>A</b>            | 30.00 (30.00 – 30.00) *                     |
| ZT6  | 20.00 (0.30 – 20.80) <b>A</b>                | 28.00 (0 - 52.00)                           | 180.00 (3.00 - 300.00)                      | 18.00 (0.10 – 30.00) #                      |
| ZT12 | 9.20 (7.20 – 14.80) <b>A</b>                 | 0 (0 - 4.00)                                | 80.00 (64.00 - 12.00)                       | 0.05 (0.001 – 0.18) <b>Ø</b>                |
| ZT18 | 10.00 (6.00 – 14.00)                         | 124.00 (0 - 400.00)                         | 84.00 (52.00 - 300.00)                      | 0.30 (0.21 – 5.20) <b>Θ</b>                 |
|      | <b>Cecum Sample (CE)</b>                     |                                             |                                             |                                             |
|      | <b>BHI (CFU <math>\times 10^{+7}</math>)</b> | <b>SA (CFU <math>\times 10^{+2}</math>)</b> | <b>MS (CFU <math>\times 10^{+6}</math>)</b> | <b>BA (CFU <math>\times 10^{+7}</math>)</b> |
| ZT0  | 0.23 (0.04 – 4.40)                           | 0.40 (0.40 - 0.80) <b>B</b>                 | 32.00 (0.76 - 76.00) <b>B</b>               | 30.00 (0.12 – 30.00)                        |
| ZT6  | 6.00 (0.30 – 12.80) <b>B</b>                 | 12.40 (4.800 - 44.00)                       | 20.00 (2.40 - 64.00)                        | 0.30 (0.16 – 7.20)                          |
| ZT12 | 0.21 (0.11 – 4.80) <b>B</b>                  | 5.60 (0 - 8.00)                             | 32.00 (28.00 - 300.00)                      | 0.003 (0.001 – 22.80)                       |
| ZT18 | 0.27 (0.08 – 6.80)                           | 3.60 (0 - 5.20)                             | 3.00 (2.04 - 300.00)                        | 0.14 (0.00004 – 30.00)                      |
|      | <b>Rectum Sample (RT)</b>                    |                                             |                                             |                                             |
|      | <b>BHI (CFU <math>\times 10^{+4}</math>)</b> | <b>SA (CFU <math>\times 10^{+2}</math>)</b> | <b>MS (CFU <math>\times 10^{+5}</math>)</b> | <b>BA (CFU <math>\times 10^{+7}</math>)</b> |
| ZT0  | 1.80 (0.002 – 22.00)                         | 0 (0 - 0.40) <b>C</b>                       | 0.17 (0.0016 - 14.00) <b>C</b>              | 12.00 (0.03 – 30.00)                        |
| ZT6  | 116.00 (0.30 – 17.20) <b>C</b>               | 0.80 (0.40 - 10.80)                         | 3000.00 (2240.00 - 3000.00)                 | 11.60 (0.30 – 19.60)                        |
| ZT12 | 16.00 (0.30 – 4.80) <b>C</b>                 | 0 (0 - 0)                                   | 4.40 (2.80 - 3000.00)                       | 8.40 (0.23 – 13.60)                         |
| ZT18 | 80.00 (2.80 – 20.80)                         | 0 (0 - 48.00)                               | 3000.00 (30.00 - 3000.00)                   | 14.40 (12.00 – 14.40)                       |
